# Supplementary material for: The Frustration-induced Ferroelectricity of a Manganite Tricolor Superlattice with Artificially Broken Symmetry
Source: Springer Nature journal article supplement (doi:10.1038/s41598-017-06640-y), 2017-07-18
Supplement: 41598_2017_6640_MOESM1_ESM.pdf [file 41598_2017_6640_MOESM1_ESM.pdf]

# The Frustration-induced Ferroelectricity of a Manganite Tricolor Superlattice with Artificially Broken Symmetry

Huanyu Pei<sup>1</sup>, Shujin Guo<sup>1</sup>, Lixia Ren<sup>1</sup>, Changle Chen<sup>1\*</sup>, Bingcheng Luo<sup>1</sup>, Xianglei Dong<sup>1</sup>, Kexin Jin<sup>1</sup>, Ren Ren<sup>2</sup> and Hafiz Muhammad Zeeshan<sup>1</sup>

<sup>1</sup>Shaanxi Key Laboratory of Condensed Matter Structures and Properties, Northwestern Polytechnical University, Xi'an, 710072, China

<sup>2</sup>Department of Physics, Xi'an Jiaotong University, Xi'an, 710072, China

\* [chenchl@nwpu.edu.cn](mailto:chenchl@nwpu.edu.cn)

## Supplementary Figure

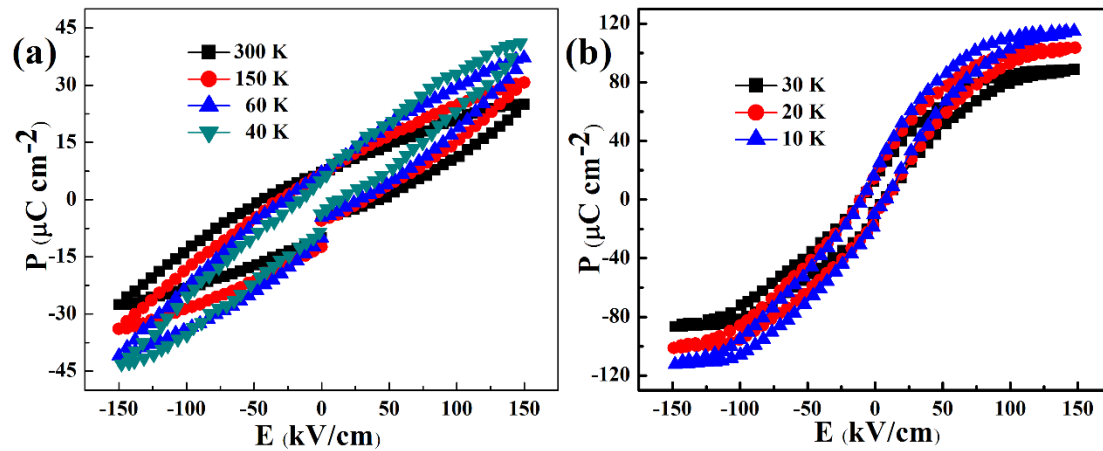

Supplementary Figure S1 The  $P$ - $E$  loops above 40 K (a) and below 30K (b).
